# Supplementary material for: Adalimumab: long-term safety in 23 458 patients from global clinical trials in rheumatoid arthritis, juvenile idiopathic arthritis, ankylosing spondylitis, psoriatic arthritis, psoriasis and Crohn's disease
Source: HighWire-hosted journal article supplement (doi:10.1136/annrheumdis-2011-201244), 2012-05-20
Supplement: annrheumdis-2011-201244_ds1.pdf [file annrheumdis-2011-201244_ds1.pdf]

## **SUPPLEMENTAL FIGURE LEGENDS**

**Figure 1S.** Time to first lymphoma, by indication. AS, ankylosing spondylitis; CD, Crohn's disease; JIA, juvenile idiopathic arthritis; Ps, psoriasis; PsA, psoriatic arthritis; RA, rheumatoid arthritis.

**Figure 2S.** Time to first NMSC, by indication. AS, ankylosing spondylitis; CD, Crohn's disease; JIA, juvenile idiopathic arthritis; NMSC, non-melanoma skin cancer; Ps, psoriasis; PsA, psoriatic arthritis; RA, rheumatoid arthritis.
