# Supplementary figures and images for: Adalimumab: long-term safety in 23 458 patients from global clinical trials in rheumatoid arthritis, juvenile idiopathic arthritis, ankylosing spondylitis, psoriatic arthritis, psoriasis and Crohn's disease
Source: HighWire-hosted journal article supplement (doi:10.1136/annrheumdis-2011-201244), 2012-05-20

**Figure 1S**

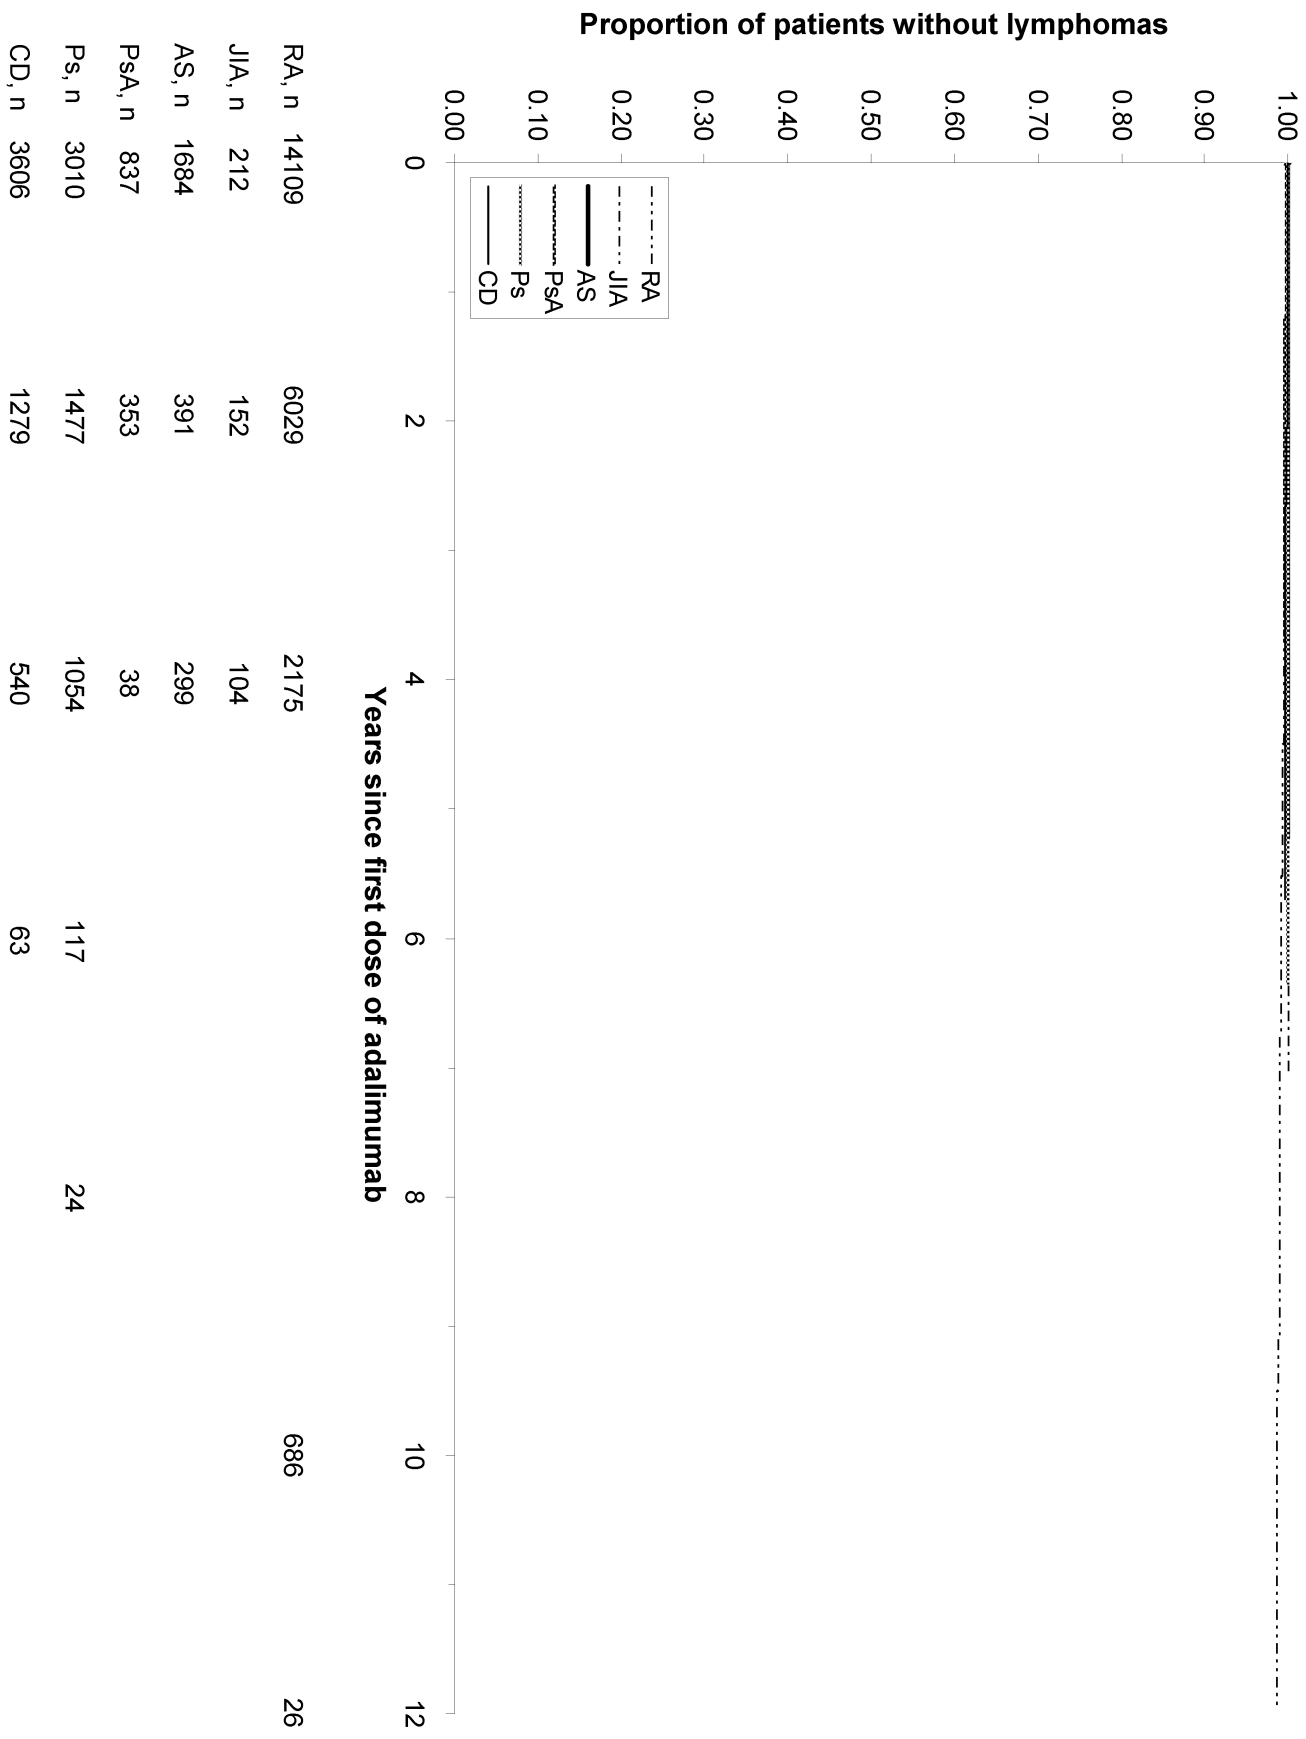

Supplement: annrheumdis-2011-201244_ds3.pdf [file annrheumdis-2011-201244_ds3.pdf]

**Figure 2S**

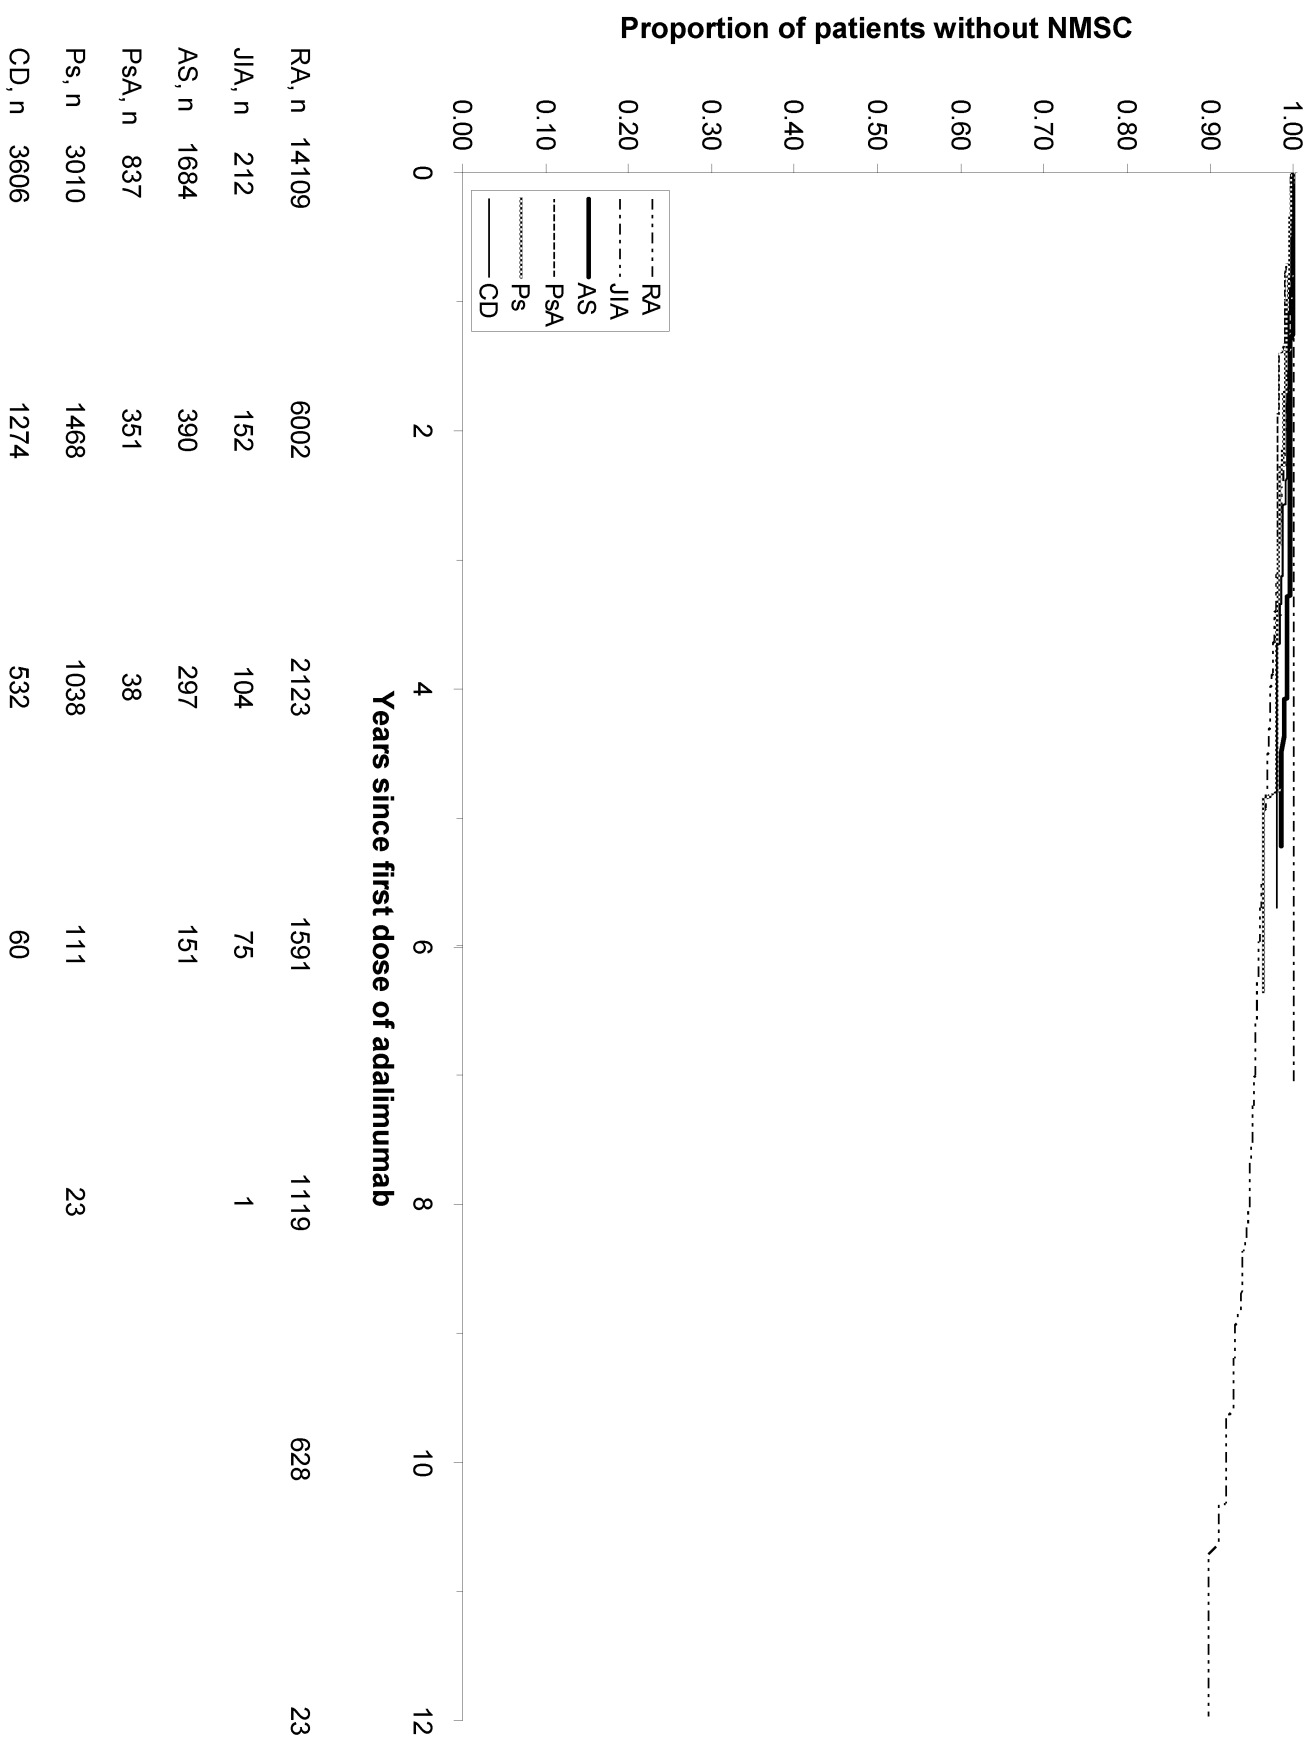

Supplement: annrheumdis-2011-201244_ds4.pdf [file annrheumdis-2011-201244_ds4.pdf]
